# Supplementary material for: Canalizaciones en fundición dúctil para aguas regeneradas
Source: MDPI journal article supplement (doi:10.3390/foods11020212), 2006-01-01
Supplement: s1 [file s1]

# Effects of processing on starch structure, textural, and digestive property of “Horisenbada”, a traditional mongolia food

Li Hongyan<sup>1</sup>, Chen Zhijun<sup>1</sup>, Yifan Mu<sup>1</sup>, Ma Ruolan<sup>1</sup>, Laxi Namujila<sup>2,3</sup>, Fu Minghai<sup>2,3\*</sup>

1 *China-Canada Joint Lab of Food Nutrition and Health (Beijing), School of Food and Health, Beijing Technology and Business University (BTBU), 11 Fucheng Road, Beijing 100048, China*

2 *NMPA Key Laboratory of Quality Control of Traditional Chinese Medicine (Mongolian Medicine), Inner Mongolia University for Nationalities, Tongliao 028000, China*

3 *School of Mongolian Medicine, Inner Mongolia University of Nationalities, Tongliao, Inner Mongolia 028000, China*

\* Correspondence: mfu@imun.edu.cn

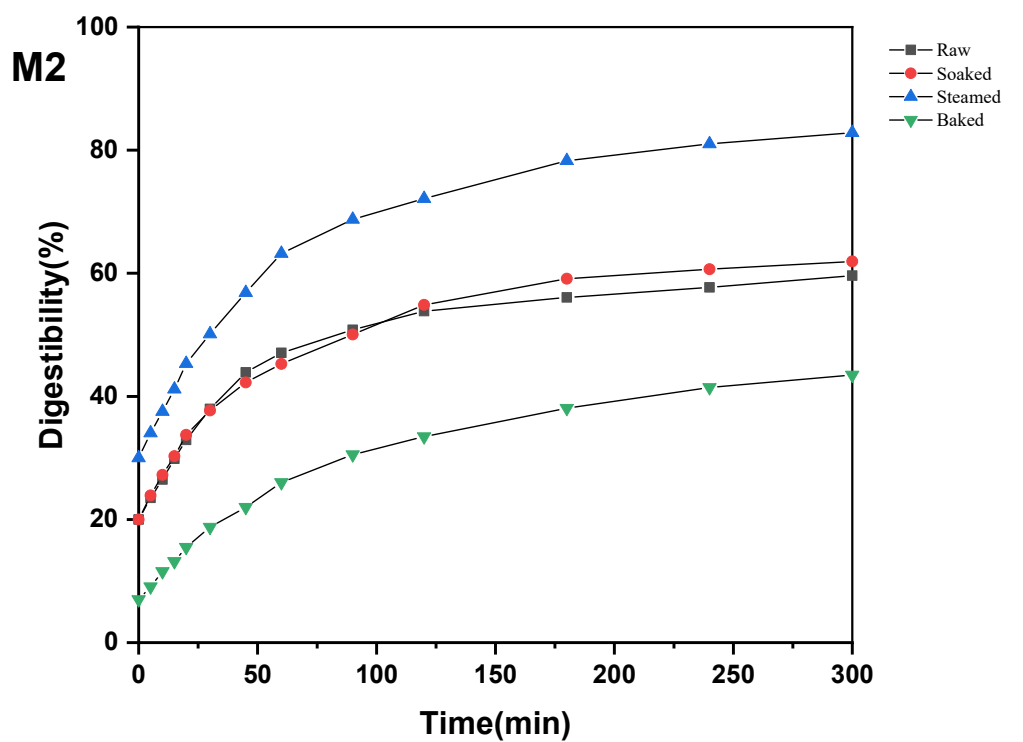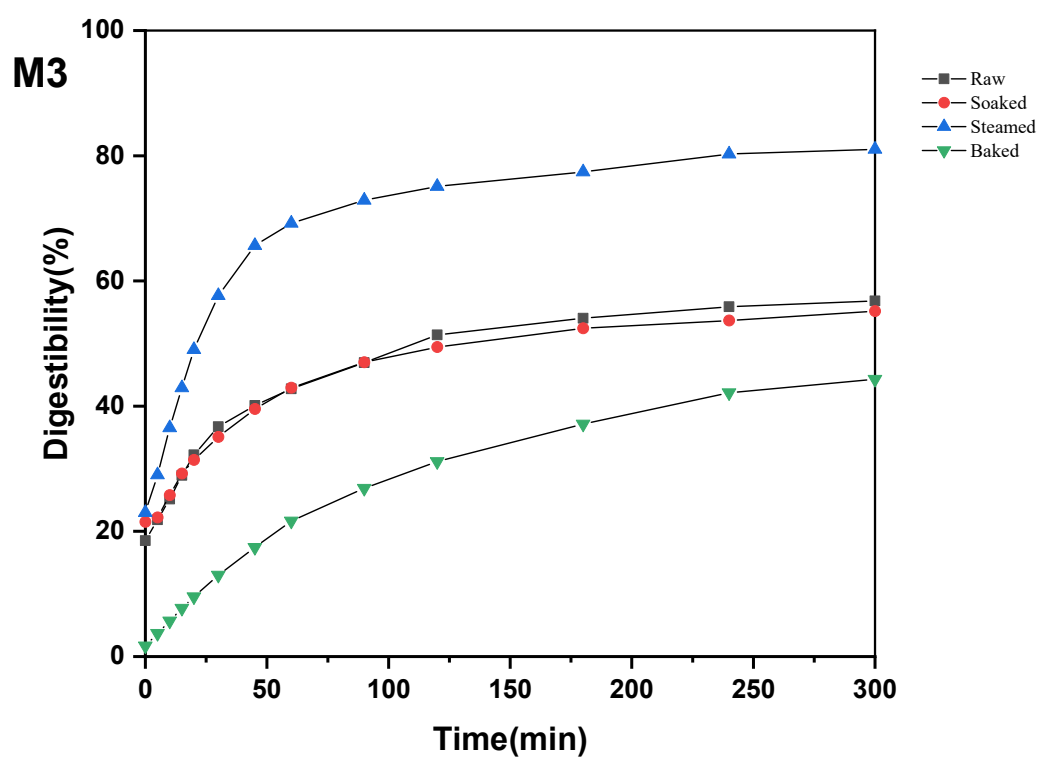

Fig. S1 The digestibility of raw and soaked, steamed, and baked M2 and M3 millets

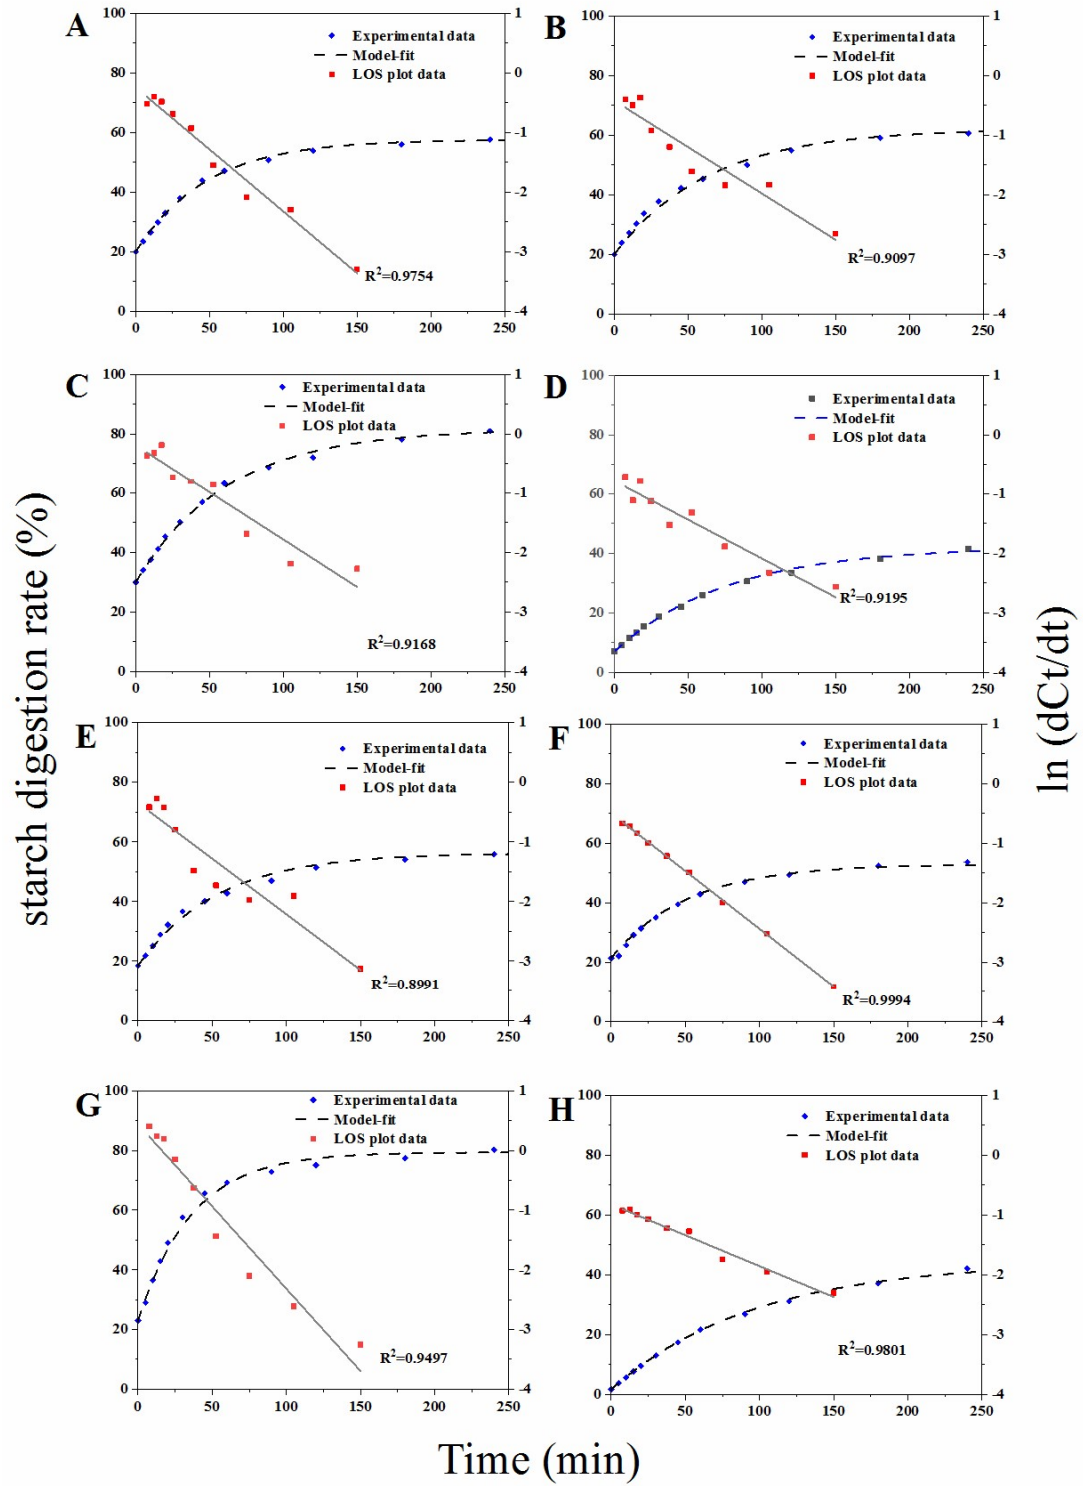

**Fig. S2** Typical starch digestion curves, LOS plots and model-fit curves from M2 and M3 millets by different processes. A, B, C, D represent native millet, soaked, steamed, and baked millets of M2, respectively; E, F, G, H represent native millet, soaked, steamed, and baked millets of M3, respectively. The R-squared values relate to the LOS plots.
